# Supplementary material for: Cation-defect-induced self-reduction towards efficient mechanoluminescence in Mn2+-activated perovskites
Source: Royal Society of Chemistry journal article supplement (doi:10.1039/d3mh00409k), 2023-01-01
Supplement: d3mh00409k1.pdf [file d3mh00409k1.pdf]

## Supporting Information

### **Cation-defect-induced self-reduction towards efficient mechanoluminescence in Mn<sup>2+</sup>-activated perovskite**

*Yao Xiao<sup>a,#</sup>, Puxian Xiong<sup>a,#,\*</sup>, Shuai Zhang<sup>a,f,#</sup>, Yongsheng Sun<sup>a</sup>, Na Yan<sup>a</sup>, Zhiduo Wang<sup>a</sup>, Qianyi Chen<sup>a</sup>, Peishan Shao<sup>a</sup>, Mikhail G. Brik<sup>b,c,d,e</sup>, Shi Ye<sup>a</sup>, Dongdan Chen<sup>a,\*</sup> and Zhongmin Yang<sup>a</sup>*

a. School of Materials Science and Engineering, School of Physics and Optoelectronics, State Key Laboratory of Luminescent Materials and Devices, Institute of Optical Communication Materials, Guangdong Engineering Technology Research and Development Center of Special Optical Fiber Materials and Devices, Guangdong Provincial Key Laboratory of Fiber Laser Materials and Applied Techniques, South China University of Technology.

b. School of Optoelectronic Engineering & CQUPT-BUL Innovation Institute, Chongqing University of Posts and Telecommunications, Chongqing, China.

c. Institute of Physics, University of Tartu, Tartu, Estonia.

d. Faculty of Science and Technology, Jan Długosz University, Częstochowa, Poland.

e. Academy of Romanian Scientists, Bucharest, Romania.

f. Condensed Matter and Interfaces, Debye Institute for Nanomaterials Science, Utrecht University, 3508 TA Utrecht, The Netherlands.

\*Corresponding author.

E-mail:

P.X. Xiong: [xiongpuxian@scut.edu.cn](mailto:xiongpuxian@scut.edu.cn);

D.D. Chen: [ddchen@scut.edu.cn](mailto:ddchen@scut.edu.cn);

$$D_q = \frac{1}{6} Z e^2 \frac{r^4}{R^5} \quad (1)$$

**Equation S1<sup>1</sup>**

Where  $D_q$  is the crystal field strength,  $Z$  is valence of the anion,  $e$  is electronic charge number,  $R$  is bond length, and  $r$  is the average value of the 3d electron coordinate.

$$[F(R_\infty)h\mu]^n = K(h\mu - E_g) \quad (2)$$

**Equation S2<sup>2</sup>**

Where  $F(R_\infty) = (1-R_\infty)^2/(2R_\infty)$  originates from the Kubelka-Munk function,  $R$  is reflectance (%),  $n = 2$  for direct-gap semiconductor material MGO host confirmed by the DFT calculation<sup>3</sup>,  $h\mu$  is the photon energy,  $K$  is a constant and  $E_g$  is the bandgap value. The  $E_g$  values can be estimated by extrapolating the linear region of  $[F(R_\infty) h\mu]^2 = 0$  to the abscissa ( $h\mu$ ).

$$R_c = 2 \left[ \frac{3V}{4\pi X_c N} \right]^{\frac{1}{3}} \quad (3)$$

**Equation S3<sup>4</sup>**

Where  $V$  is volume of the unit cell,  $X_c$  is critical concentration, and  $N$  is the number of available sites per unit cell that  $Mn^{2+}$  ion can occupy. According to  $V = 902.627 \text{ \AA}^3$ ,  $X_c = 0.025$ , and  $N = 6$ .

$$\frac{I}{x} = K \left[ 1 + \beta(x)^{\frac{\theta}{3}} \right]^{-1} \quad (4)$$

**Equation S4<sup>5</sup>**

Where  $I$  is PL intensity,  $x$  is the concentration of doped ion,  $K$  and  $\beta$  are the constants for each type of interaction in a given host lattice, and  $\theta$  is the index of electric multipole corresponded to the dipole-dipole ( $\theta = 6$ ), dipole-quadrupole ( $\theta = 8$ ), and quadrupole-quadrupole ( $\theta = 10$ ), respectively.

$$I(t) = I_0 + A_1 \exp\left(\frac{-t}{\tau_1}\right) + A_2 \exp\left(\frac{-t}{\tau_2}\right) \quad (5)$$

**Equation S5**

**Equation**

**S6**

$$\tau^* = \frac{A_1 \tau_1^2 + A_2 \tau_2^2}{A_1 \tau_1 + A_2 \tau_2} \quad (6)$$

Where  $I(t)$  is fluorescence intensity,  $A_1$  and  $A_2$  are constants,  $t$  is time, and  $\tau_1$  and  $\tau_2$  are short decay and long decay component, respectively,  $\tau^*$  is average fluorescence lifetimes.

**Table S1** Rietveld refined crystallographic parameters of the  $M_{1-x}GOM_x$  ( $x = 0.0\%$ ,  $1.0\%$ ,  $1.5\%$ ,  $2.0\%$ ,  $2.5\%$ ,  $3.0\%$ ,  $3.5\%$  and  $4.0\%$ ).

| Formula                      | x=0.0<br>%       | x=1.0<br>%       | x=1.5<br>%       | x=2.0<br>%       | x=2.5<br>%       | x=3.0<br>%       | x=3.5<br>%       | x=4.0<br>%       |
|------------------------------|------------------|------------------|------------------|------------------|------------------|------------------|------------------|------------------|
| Crystal system               | Orthorho mbic    |
| Space group                  | <i>Pbca</i> (61) |
| a (Å)                        | 18.812600        | 18.816607        | 18.819016        | 18.826696        | 18.828976        | 18.823975        | 18.827681        | 18.830244        |
| b (Å)                        | 8.955900         | 8.958043         | 8.959315         | 8.963080         | 8.964110         | 8.960978         | 8.963644         | 8.964868         |
| c (Å)                        | 5.343400         | 5.344328         | 5.345414         | 5.347877         | 5.348938         | 5.346455         | 5.347981         | 5.348900         |
| $\alpha=\beta=\gamma$ (°)    | 90               | 90               | 90               | 90               | 90               | 90               | 90               | 90               |
| volume (Å <sup>3</sup> )     | 900.276          | 900.840          | 901.266          | 902.428          | 902.820          | 901.847          | 902.550          | 902.951          |
| Z                            | 16               | 16               | 16               | 16               | 16               | 16               | 16               | 16               |
| Density (g/cm <sup>3</sup> ) | 4.276            | 4.273            | 4.271            | 4.266            | 4.264            | 4.269            | 4.265            | 4.263            |
| R <sub>wp</sub> (%)          | 8.64             | 11.35            | 10.96            | 10.77            | 11.43            | 11.39            | 11.64            | 11.12            |
| R <sub>p</sub> (%)           | 7.22             | 8.96             | 8.70             | 8.56             | 9.06             | 9.01             | 9.16             | 8.89             |
| $\chi^2$                     | 1.762            | 1.973            | 1.786            | 1.842            | 1.744            | 2.061            | 2.264            | 2.041            |

**Table S2** Different atomic site occupancy and select interatomic distances of  $M_{0.975}GOM_{0.25}$ .

| Element | x       | y       | z       | Occupancy | Bond type | Bond length (Å) |
|---------|---------|---------|---------|-----------|-----------|-----------------|
| Mg1     | 0.12289 | 0.65224 | 0.85428 | 0.984     | Mg1-O1    | 2.17336         |
| Mn1     | 0.12289 | 0.65224 | 0.85428 | 0.016     | Mg1-O2    | 2.02703         |
| Mg2     | 0.12233 | 0.49178 | 0.34493 | 0.991     | Mg1-O4    | 2.19131         |
| Mn2     | 0.12233 | 0.49178 | 0.34493 | 0.009     | Mg1-O5    | 1.97006         |
| Ge1     | 0.02835 | 0.3388  | 0.80419 | 1         | Mg2-O1    | 2.04031         |
| Ge2     | 0.22905 | 0.3454  | 0.0377  | 1         | Mg2-O2    | 1.98739         |
| O1      | 0.93678 | 0.33823 | 0.80115 | 1         | Mg2-O3    | 2.35409         |

|    |         |         |         |   |        |         |
|----|---------|---------|---------|---|--------|---------|
| O2 | 0.07212 | 0.48479 | 0.67202 | 1 | Mg2-O4 | 2.07033 |
| O3 | 0.04831 | 0.32472 | 0.12636 | 1 | Mg2-O5 | 2.05916 |
| O4 | 0.31758 | 0.34117 | 0.00923 | 1 | Mg2-O6 | 2.37165 |
| O5 | 0.18544 | 0.51113 | 0.03178 | 1 |        |         |
| O6 | 0.19468 | 0.27513 | 0.32719 | 1 |        |         |

**Table S3** Fluorescence decay lifetimes of  $M_{1-x}GOM_x$  ( $x = 1.0\%$ ,  $1.5\%$ ,  $2.0\%$ ,  $2.5\%$ ,  $3.0\%$ ,  $3.5\%$  and  $4.0\%$ ) ( $\lambda_{ex}=260$  nm,  $\lambda_{em}=679$  nm).

| Sample | $A_1$      | $\tau_1$ (ns) | $A_2$      | $\tau_2$ (ns) | R-square | $\tau^*$ (ms) |
|--------|------------|---------------|------------|---------------|----------|---------------|
| x=1.0% | 1712.22833 | 2869116.40256 | 2926.68579 | 1.42209E7     | 0.99857  | 13.02         |
| x=1.5% | 1750.20694 | 2679180.6074  | 3000.2515  | 1.34358E7     | 0.99865  | 11,78         |
| x=2.0% | 1761.48557 | 2383762.53679 | 2980.86196 | 1.27743E7     | 0.99867  | 11,74         |
| x=2.5% | 1774.16551 | 2254861.94701 | 2946.02288 | 1.12774E7     | 0.99872  | 10.31         |
| x=3.0% | 1888.46163 | 1813844.09579 | 2857.80648 | 1.049E7       | 0.99865  | 9.60          |
| x=3.5% | 1937.32916 | 1498568.73388 | 2786.12222 | 9559481.06512 | 0.99849  | 8.77          |
| x=4.0% | 2009.89027 | 1095479.2125  | 2760.02117 | 8133180.19935 | 0.99831  | 7.51          |

The formation energy of a  $V_{Mg}''$  defect in charge state  $q$  is defined the following equation<sup>6</sup>:

$$E^f[X^q] = E_{tot}[X^q] - E_{tot}[bulk] - \sum_i n_i \mu_i + qE_F + E_{corr}$$

$E_{tot}[X^q]$  is the total energy originated from a supercell calculation containing the defect  $V_{Mg}''$ , and  $E_{tot}[bulk]$  is the total energy for the perfect crystal using an equivalent supercell. The integer  $n_i$  represents the number of atoms of type  $i$  (impurity atoms or host atoms) that have been added to ( $n_i > 0$ ) or removed from ( $n_i < 0$ ) the supercell to form the defect, and the  $\mu_i$  is the corresponding chemical potentials of these species (chemical potentials display the energy of the reservoirs with which atoms are being exchanged). The analog of the chemical potential for “charge” is given by the chemical potential of the electrons, i.e., the Fermi energy  $E_F$ . Finally,  $E_{corr}$  is a correction term that accounts for finite k-point sampling in the case of shallow impurities, or for elastic

or electrostatic interactions between supercells. We present the charge state of a defect with a superscript  $q$  such as: for a neutral defect,  $q = 0$ ; if one electron is removed,  $q = +1$ ; if one electron is added,  $q = -1$ , etc. Interestingly, only neutral defects can occur in a metal. However, the defect can typically assume various charge states in a semiconductor or insulator, completed through exchanging electrons with an electron reservoir, which the energy is the electron chemical potential or Fermi level  $E_F$ , conventionally referenced to the VBM in the host.

**Table S4** Total Energy ( $E_{\text{tot}}$ ) and Formation Energy ( $E^f$ ) of MGO for  $\text{Mn}^{4+}$  or  $\text{Mn}^{2+}$  ion doped.

| MgGeO <sub>3</sub> compound | host     | $\text{Mn}^{2+}$ ion occupy $\text{Mg}^{2+}$ site | $\text{Mn}^{2+}$ ion replaces $\text{Mg}^{2+}$ site leaving a $V_{\text{Mg}}''$ | $\text{Mn}^{4+}$ ion replaces $\text{Mg}^{2+}$ site leaving a $V_{\text{Mg}}''$ |
|-----------------------------|----------|---------------------------------------------------|---------------------------------------------------------------------------------|---------------------------------------------------------------------------------|
| $E_{\text{tot}}$ (eV)       | -4047.57 | -4051.15                                          | -4043.89                                                                        | -4050.65                                                                        |
| $E^f$ (eV)                  | 0        | -2.87                                             | -3.15                                                                           | -3.86                                                                           |

**Table S5** Fitted TL peaks and depth of traps energy level of  $\text{M}_{1-x}\text{GOM}_x$  ( $x = 1.0\%$ ,  $1.5\%$ ,  $2.0\%$ ,  $2.5\%$ ,  $3.0\%$ ,  $3.5\%$  and  $4.0\%$ ).

| Sample    | Peak 1 (K) | Peak 2 (K) | Peak 3 (K) | R-square | E1 (eV) | E2 (eV) | E3 (eV) |
|-----------|------------|------------|------------|----------|---------|---------|---------|
| $x=1.0\%$ | 365.0      | 430.9      | 505.5      | 0.99553  | 0.73    | 0.8618  | 1.011   |
| $x=1.5\%$ | 358.9      | 428.8      | 498.8      | 0.99427  | 0.7178  | 0.8576  | 0.9976  |
| $x=2.0\%$ | 359.5      | 424.1      | 490.5      | 0.99363  | 0.719   | 0.8482  | 0.981   |
| $x=2.5\%$ | 354.5      | 421.9      | -          | 0.99662  | 0.709   | 0.8438  | -       |
| $x=3.0\%$ | 356.7      | 421.6      | -          | 0.99275  | 0.7134  | 0.8432  | -       |
| $x=3.5\%$ | 359.9      | 428.7      | -          | 0.994662 | 0.7198  | 0.8574  | -       |
| $x=4.0\%$ | 353.8      | 418.1      | -          | 0.99195  | 0.7076  | 0.8362  | -       |

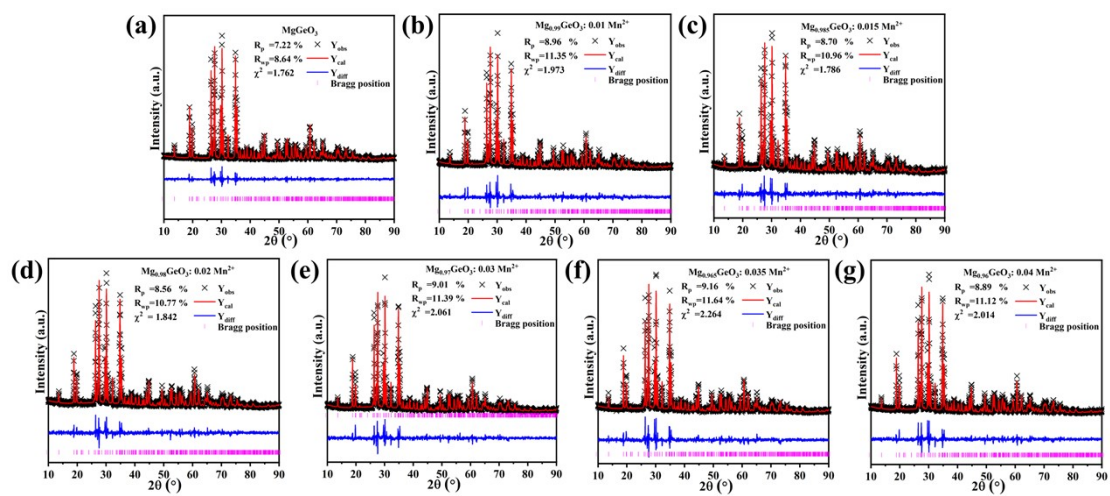

**Figure S1** (a-g) Rietveld refinement results of  $Mg_{1-x}GOM_x$  ( $x = 0.0\%, 1.0\%, 1.5\%, 2.0\%, 3.0\%, 3.5\%$  and  $4.0\%$ ).

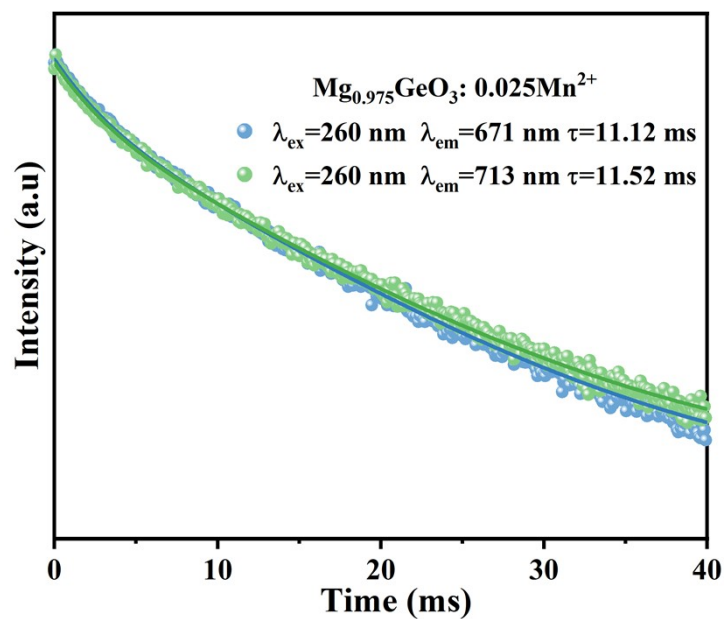

**Figure S2** Fluorescence lifetime curves of  $\text{M}_{0.975}\text{GOM}_{0.025}$  monitored at 671 and 713 nm, respectively, ( $\lambda_{\text{ex}}=260$  nm).

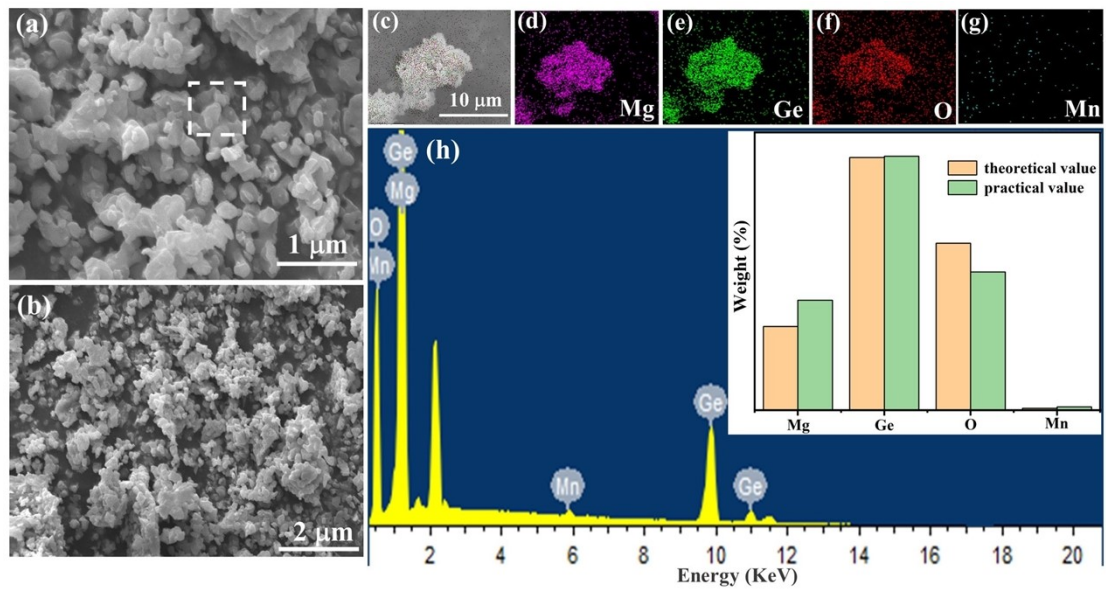

**Figure S3** (a-b) SEM images of  $M_{0.99}GOM_{0.01}$  at magnification of 10K (a) and 5K (b). (c) Selected area SEM image of  $M_{0.99}GOM_{0.01}$ . (d-g) The mapping images of elements Mg, Ge, O and Mn, respectively. (h) EDS elements analysis and a comparison of theoretical and practical value.



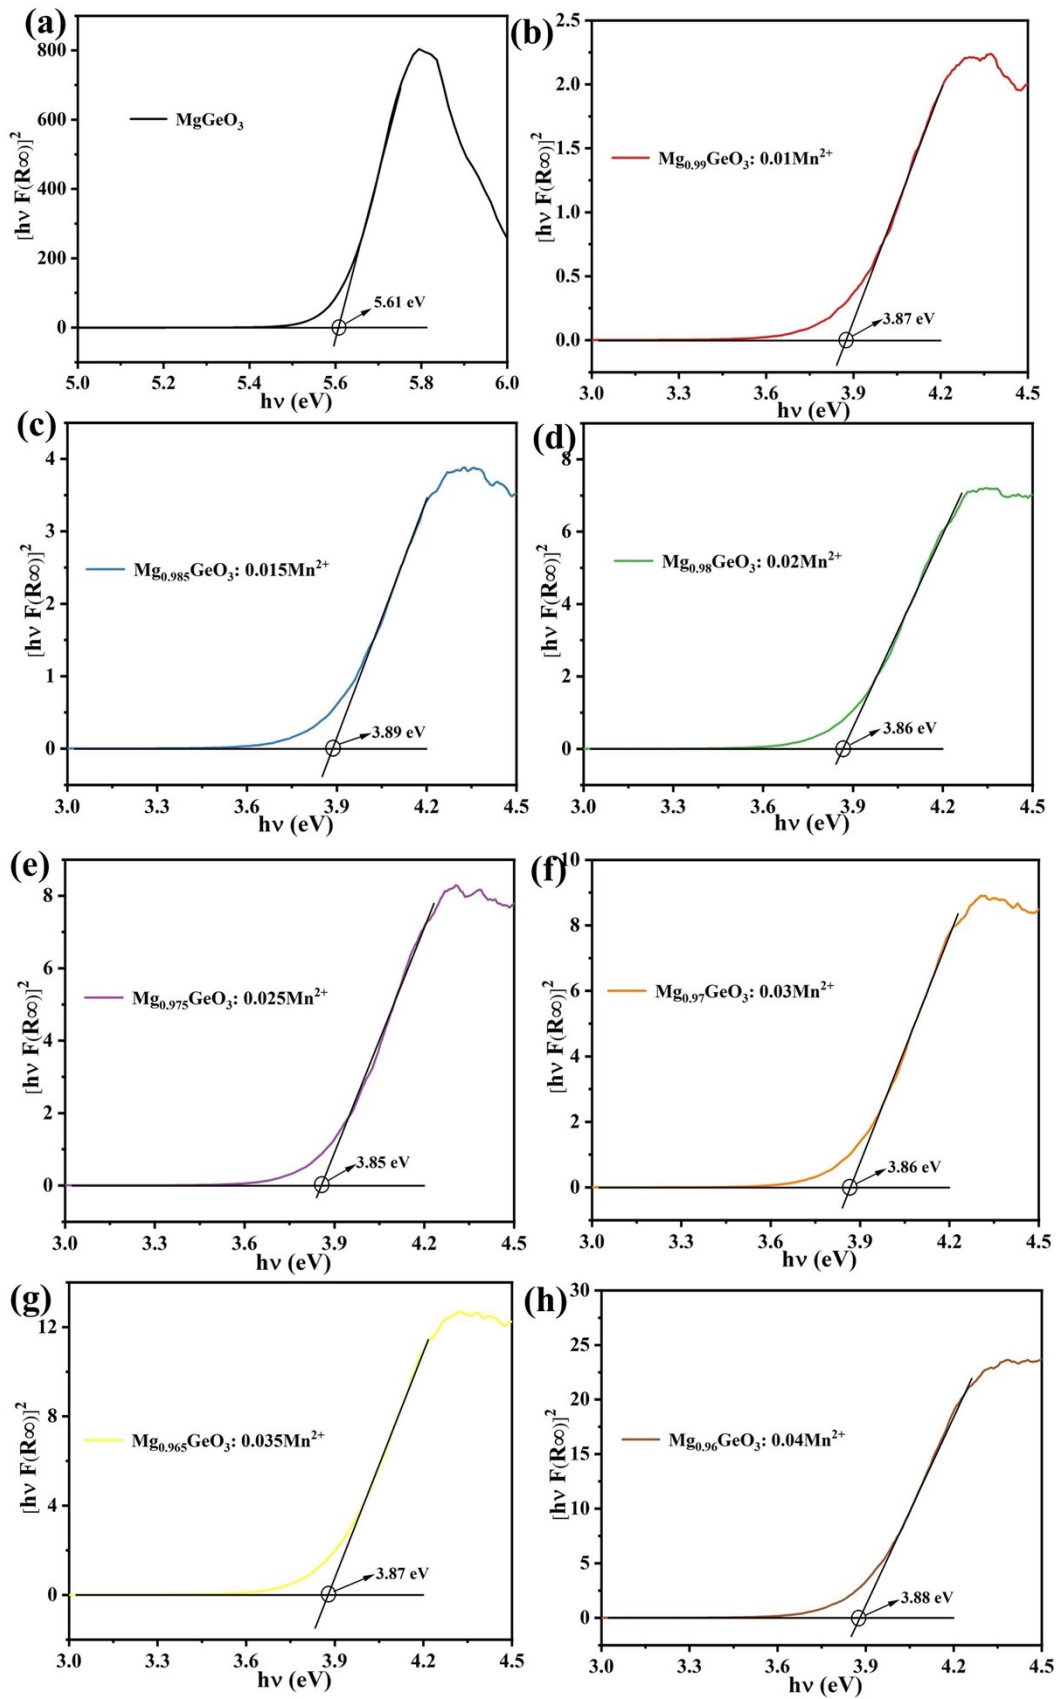

**Figure S4** (a-h) Functional curve of  $[\hbar\nu F(\infty)]^2$  versus  $\hbar\nu$  for calculation  $E_g$  value for  $M_{1-x}GOM_x$  ( $x = 0.0\%$ ,  $1.0\%$ ,  $1.5\%$ ,  $2.0\%$ ,  $3.0\%$ ,  $3.5\%$  and  $4.0\%$ ).

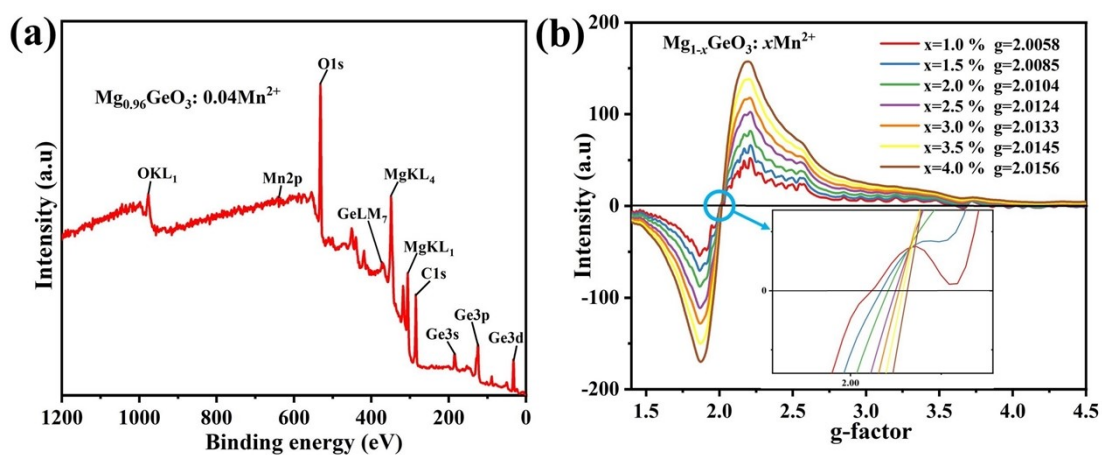

**Figure S5** (a) XPS survey curve of  $Mg_{0.96}GOM_{0.04}M$ . (b) g-factor value of  $Mg_{1-x}GOM_x$  ( $x = 1.0\%$ ,  $1.5\%$ ,  $2.0\%$ ,  $3.0\%$ ,  $3.5\%$  and  $4.0\%$ ). The inset shows enlarged curves.

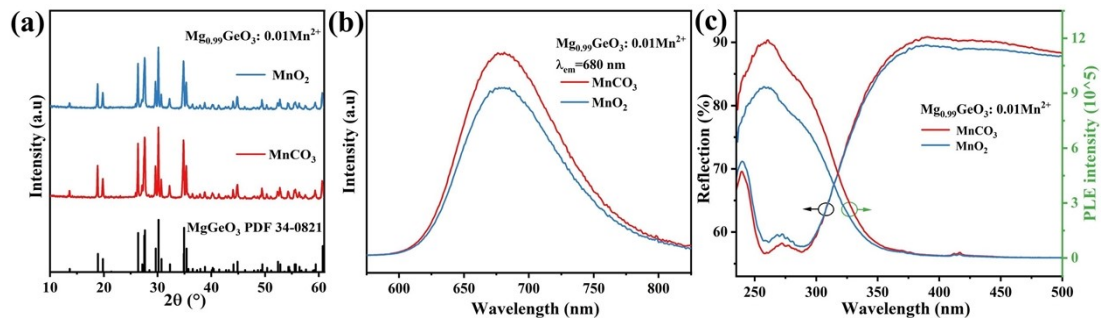

**Figure S6** PL spectra of  $\text{M}_{0.99}\text{GOM}_{0.01}$  using different manganese source ( $\text{MnCO}_3$  and  $\text{MnO}_2$ ,  $\lambda_{\text{em}}=680$  nm). (b) XRD pattern of  $\text{M}_{0.99}\text{GOM}_{0.01}$  using different manganese source ( $\text{MnCO}_3$  and  $\text{MnO}_2$ ). (c) PLE and DR spectra of  $\text{M}_{0.99}\text{GOM}_{0.01}$  using different manganese source ( $\text{MnCO}_3$  and  $\text{MnO}_2$ ).

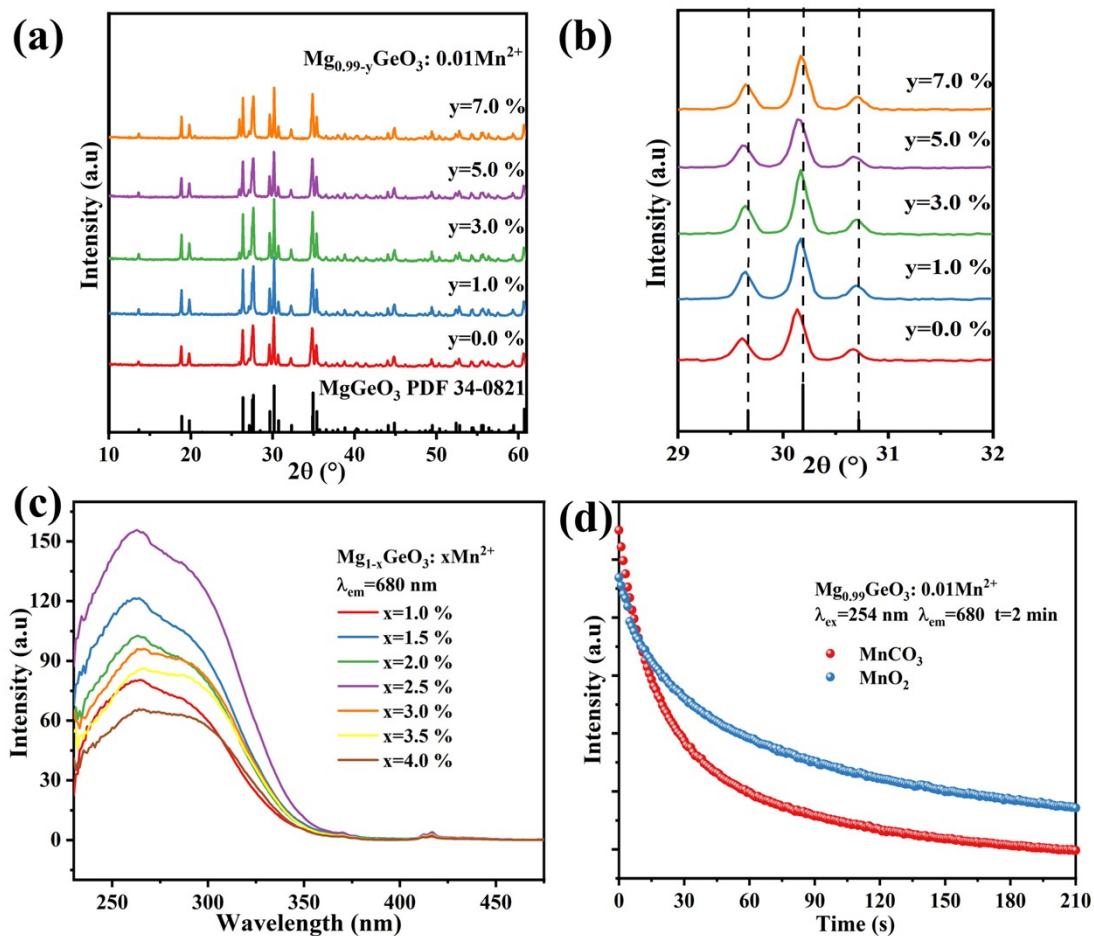

**Figure S7** (a) XRD patterns of  $\text{M}_{0.99-y}\text{GOM}_{0.01}$  ( $y = 0.0\%$ ,  $1.0\%$ ,  $3.0\%$ ,  $5.0\%$  and  $7.0\%$ ) and the standard card of MGO (PDF 34-0821). (b) Partial enlargement of XRD pattern between  $2\theta = 29^\circ$  and  $32^\circ$ . (c) PLE spectra of  $\text{M}_{0.99-y}\text{GOM}_{0.01}$  ( $y = 0.0\%$ ,  $1.0\%$ ,  $3.0\%$ ,  $5.0\%$  and  $7.0\%$ ). (d) PersL curves of  $\text{M}_{0.99}\text{GOM}_{0.01}$  using different manganese source ( $\text{MnCO}_3$  and  $\text{MnO}_2$ ) ( $\lambda_{\text{ex}} = 254$  nm pre-irradiation 2 min,  $\lambda_{\text{em}} = 679$  nm).

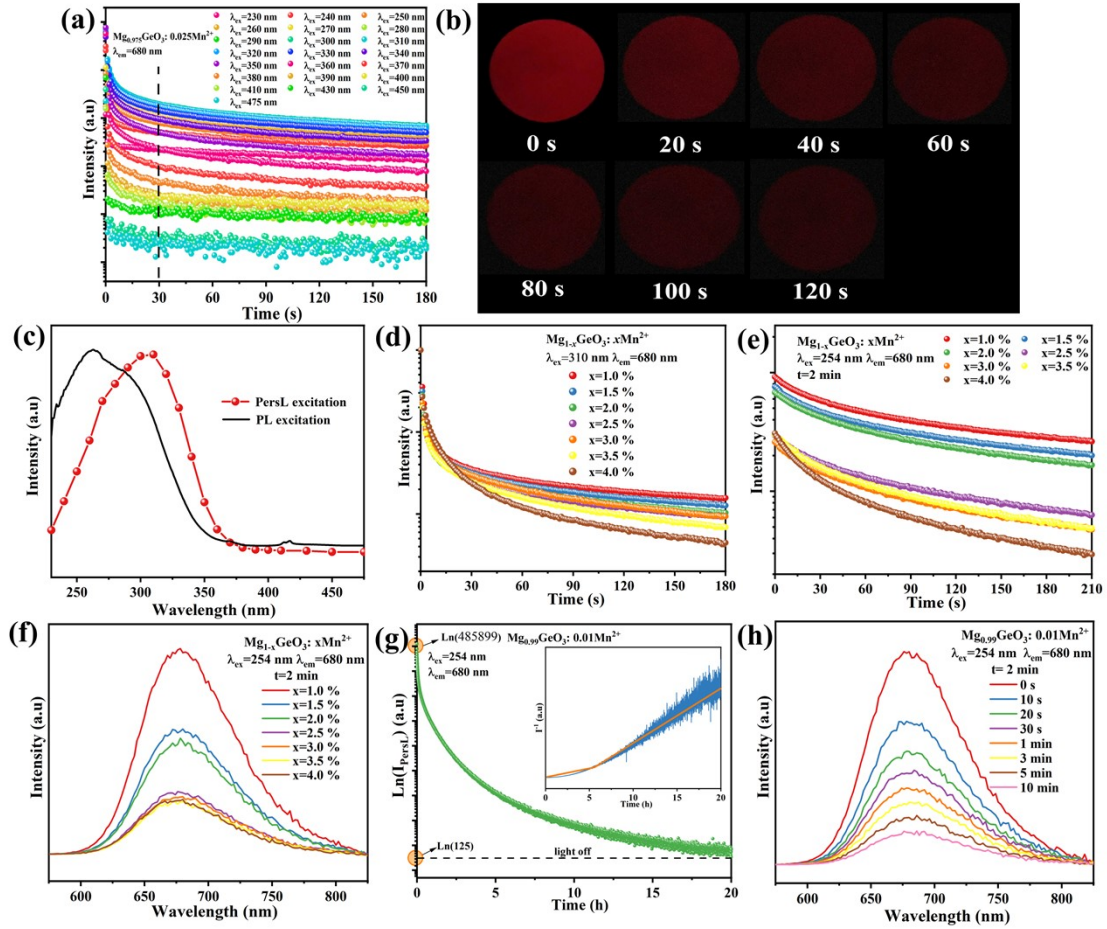

**Figure S8** (a) PersL decay curves of  $M_{0.975}G_{0.025}$  excited by different wavelength lights (Xe lamp, 230 nm-475 nm) for 30 s. (b) PersL images of  $M_{0.99}G_{0.01}$  pre-irradiated by a 254 nm UV lamp for 2 min in 2 min decay. (c) PersL excitation spectra plotted by PersL intensity (recorded at 30 s delay) as a function of the excitation wavelength compared with PLE spectrum of  $M_{0.975}G_{0.025}$ . (d) PersL decay curves of  $M_{1-x}G_{0.01}$  ( $x = 0.0\%, 1.0\%, 1.5\%, 2.0\%, 2.5\%, 3.0\%, 3.5\%$  and  $4.0\%$ ) ( $\lambda_{ex}=310$  nm,  $\lambda_{em}=680$  nm, Xe lamp). (e) PersL decay curves of  $M_{1-x}G_{0.01}$  ( $x = 0.0\%, 1.0\%, 1.5\%, 2.0\%, 2.5\%, 3.0\%, 3.5\%$  and  $4.0\%$ ) ( $\lambda_{ex}=254$  nm,  $\lambda_{em}=680$  nm, UV lamp pre-irradiation for 2 min). (f) PersL spectra of  $M_{1-x}G_{0.01}$  ( $x = 0.0\%, 1.0\%, 1.5\%, 2.0\%, 2.5\%, 3.0\%, 3.5\%$  and  $4.0\%$ ) ( $\lambda_{ex}=254$  nm, UV lamp pre-irradiation for 2 min). (g) Ultra-PersL (15 h) curve of  $M_{0.99}G_{0.01}$  and the reciprocal intensity ( $I^{-1}$ ) versus time (t) ( $\lambda_{ex}=254$  nm,  $\lambda_{em}=680$  nm, UV lamp pre-irradiation for 2 min). (h) PersL spectra of  $M_{0.99}G_{0.01}$  in 10 min decay ( $\lambda_{ex}=254$  nm pre-irradiation for 2 min,  $\lambda_{em}=680$  nm).

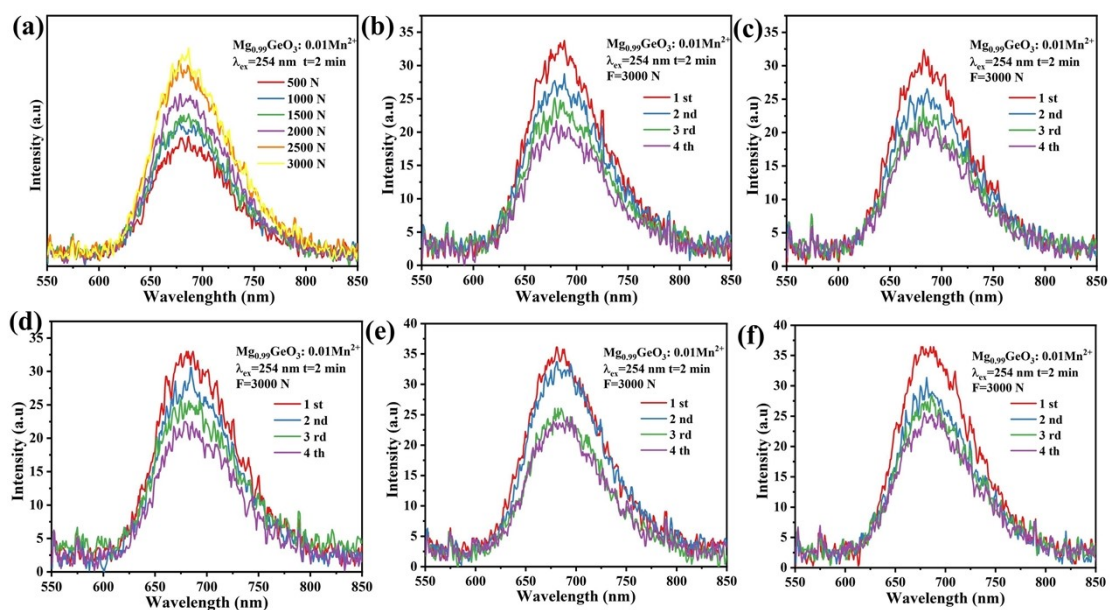

**Figure S9** (a) ML spectra of  $M_{0.99}G_{0.01}$  pre-irradiated by a 254 nm UV lamp for 2 min at different loading stresses (500, 1000, 1500, 2000, 2500 and 3000 N). (b-c) ML spectra of  $M_{0.99}G_{0.01}$  recorded by four cycles at 40 s intervals (254 nm UV lamp pre-irradiation for 2 min at 3000 N cyclic loading stress) (b) 1st cycle; (c) 2nd cycle; (d) 3rd cycle; (e) 4th cycle; (f) 5th cycle.

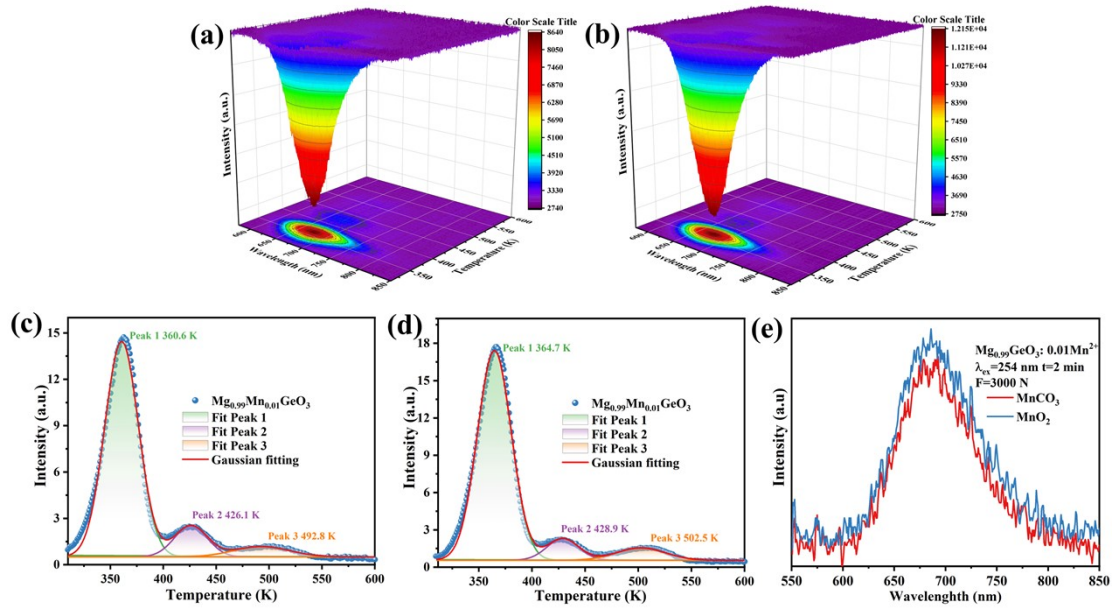

**Figure S10** (a-b) Three-dimensional thermoluminescence of  $Mg_{0.99}GOM_{0.01}$  using different manganese source of (a)  $MnCO_3$  and (b)  $MnO_2$ . (c-d) Fitted TL curve of  $Mg_{0.99}GOM_{0.01}$  using different manganese source of (c)  $MnCO_3$  and (d)  $MnO_2$ . Green, purple, orange dotted line represented to Peak 1 (trap 1), Peak 2 (trap 2), and Peak 3 (trap 3), respectively. (e) ML spectra of  $Mg_{0.99}GOM_{0.01}$  using different manganese source ( $MnCO_3$  and  $MnO_2$ ) pre-irradiated by a 254 nm UV lamp for 2 min at 3000 N loading.

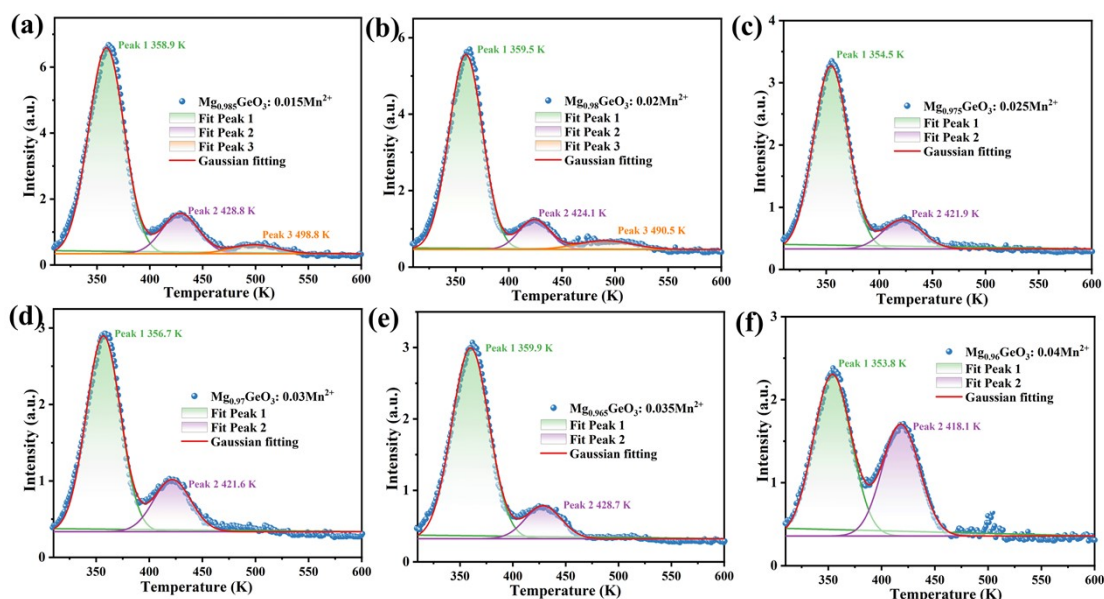

**Figure S11** (a-f) Fitted TL curve of  $M_{1-x}GOM_x$  ( $x = 1.5\%$ ,  $2.0\%$ ,  $2.5\%$ ,  $3.0\%$ ,  $3.5\%$  and  $4.0\%$ ); Green, purple, orange dotted line represented to Peak 1 (trap 1), Peak 2 (trap 2), and Peak 3 (trap 3), respectively.

## References

1. S. Wu, Q. Liu, P. Xiong, W. Chen, Q. Dong, D. Chen, D. Wang, G. Zhang, Y. Chen and G. Li, *Adv. Opt. Mater.*, 2022, 2102842.
2. L. Guo, T. Wang, Q. Wang, W. Feng, Z. Li, S. Wang, P. Xia, F. Zhao and X. Yu, *Chem. Eng. J.*, 2022, **442**, 136236.
3. Y. Katayama, T. Kayumi, J. Ueda and S. Tanabe, *Opt. Mater.*, 2018, **79**, 147-151.
4. X. Ding, G. Zhu, W. Geng, Q. Wang and Y. Wang, *Inorg. Chem.*, 2016, **55**, 154-162.
5. F. Xiao, C. Xie, R. Yi, H. Yuan and Q. Zhou, *Opt. Mater.*, 2022, **125**, 112131.
6. C. Freysoldt, B. Grabowski, T. Hickel, J. Neugebauer, G. Kresse, A. Janotti and C. G. Van de Walle, *Rev. mod. phys.*, 2014, **86**, 253.
